# Supplementary material for: Evidence for a Retroviral Insertion in TRPM1 as the Cause of Congenital Stationary Night Blindness and Leopard Complex Spotting in the Horse
Source: PLoS One. 2013 Oct 22;8(10):e78280. doi: 10.1371/journal.pone.0078280 (PMC3805535; doi:10.1371/journal.pone.0078280)
Supplement: Table S1 — Predicted protein functions for LP insertion transcript. Nine potential ORF of the LTR insertion transcript were investigated using the PFP and ESG protein prediction servers. GO molecular functions and biological processes with probabilities equal to or greater than 60% are reported. (XLSX) [file pone.0078280.s005.xlsx]

## Sheet: Sheet1
	ORF1	ORF2	ORF3	ORF4	ORF5	ORF6	ORF7	ORF8	ORF9
Length (aa)	90	40	29	36	70	57	37	29	36
PFP molecular function probability (%)	protein kinase CK2 activity (83%) transition metal ion binding (80%) binding (78%) casein kinase activity (77%) adenyl nucleotide binding (73%) ion binding (72%) cation binding (62%) nucleic acid binding (62%)	cation binding (60%)	ion binding (60%)	cation binding (64%)	dolichyl-phosphate beta-D-mannosyltransferase activity (90%) ion binding (80%) binding (77%) cation binding (70%) transition metal ion binding (68%) nucleic acid binding (62%)	no predictions found	ion binding (70%)	all probabilities less than 60%	all probabilities less than 60%
PFP biological process probability (%)	regulation of biological process (100%) transcription, DNA-dependent (85%) regulation of adenylate cyclase activity (81%) regulation of retinal programmed cell death (sensu Endopterygota) (80%) spermathecum morphogenesis (75%) nucleobase, nucleoside, nucleotide and nucleic acid metabolism (74%) vitamin metabolism (73%) vitamin biosynthesis (71%) monosaccharide metabolism (71%) C21-steroid hormone…	biopolymer synthesis (68%) cellular metabolism (65%) nucleic acid transport (61%)	monosaccharide metabolism (72%) cellular metabolism (65%)	cellular metabolism (65%)	regulation of biological process (100%) cofactor metabolism (82%) purine ribonucleoside biosynthesis (78%) water-soluble vitamin metabolism (74%) heterocycle metabolism (74%) purine nucleoside biosynthesis (73%) vitamin metabolism (73%) ribonucleoside biosynthesis (73%) porphyrin metabolism (70%) nucleoside biosynthesis (69%) vitamin biosynthesis (69%) nitrogen compound catabolism (68%) cellular …	all probabilities less than 60%	cellular metabolism (69%)	cellular metabolism (65%)	all probabilities less than 60%
ESG molecular function probability (%)	all probabilities less than 60%	no predictions found	no predictions found	no predictions found	RNA binding (60%) RNA directed DNA polymerase activity (60%) transferase activity (60%) nucleotidyltransferase activity (60%)	no predictions found	no predictions found	no predictions found	no predictions found
ESG biological process probability (%)	all probabilities less than 60%	no predictions found	no predictions found	no predictions found	RNA-dependent DNA replication (60%)	no predictions found	no predictions found	no predictions found	no predictions found
